# Supplementary material
Source: ML conference proceedings conference paper supplement (https://proceedings.neurips.cc/paper_files/paper/2009/hash/0ff39bbbf981ac0151d340c9aa40e63e-Abstract.html)
Supplement: Supplementary file 2 [file 0ff39bbbf981ac0151d340c9aa40e63e-Supplemental.zip]

Archive with 1 entries (1 files):
- extra/NIPS2009_0646_extra.pdf
